# Supplementary material for: Patient and healthcare professional perspectives on which potential prognostic factors for failure of total elbow replacement should be investigated
Source: Research Square preprint supplement (doi:10.21203/rs.3.rs-6528667/v1), 2025-05-07
Supplement: Supplementary file [file 493db7ba41845a276b649ddb.pdf]

## Default Question Block

### Study title: the predictors of failure in total elbow replacement

Funders: The National Joint Registry (NJR), The Royal College of Surgeons of England (RCSEng), and The John Charnley Trust

Aim: the purpose of this study is to examine which prognostic factors might be associated with total elbow replacement failure using the NJR data

Dear PPIE member,

We would be very grateful if you can complete this very short survey. The purpose of this survey is to establish which prognostic factors that might be associated with the failure and needing revision surgery of total elbow replacement that patients think are important and need investigating.

A prognostic factor in this study will be defined as any variable that is associated with a risk of failure leading to revision surgery in patients with total elbow replacement. The study will focus on prognostic factors that can be

measured before or during surgery to support clinicians and patients in the decision-making and assessing the risk of failure associated with surgery. In this survey, several prognostic factors are grouped into patient factors, implant factors, surgery factors, and surgeon/hospital factors. If there are any other prognostic factors you think are important to investigate then please specify them in the free text boxes.

Many thanks

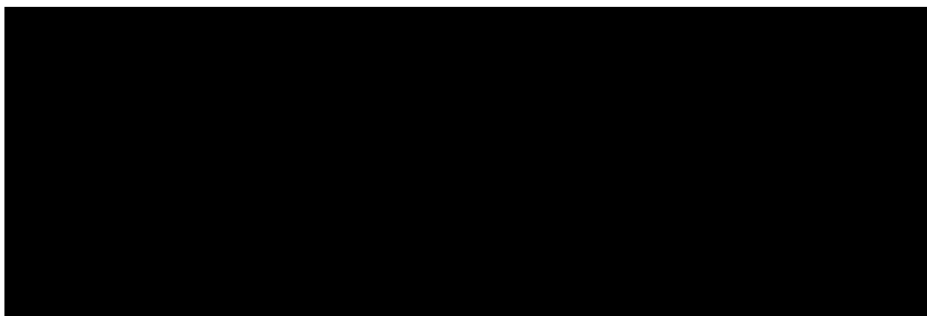

Benefits and risks: there is no personal benefit from undertaking part in this survey. The data will be used to guide our research in which prognostic factors to include in our analysis. No risks are associated with this survey.

Confidentiality: no personal data are collected in this survey therefore, responses will remain completely anonymous. No one will be able to identify who has participated in this survey.

By choosing agree you consent to take part in this survey.

- ☐ Agree and proceed
- ☐ Disagree and stop

The association between this **patient factor** and failure of total elbow arthroplasty is important to be investigated?

|                                                     | Strongly disagree     | Somewhat disagree     | Neither agree nor disagree | Somewhat agree        | Strongly agree        | I do not know what this is |
|-----------------------------------------------------|-----------------------|-----------------------|----------------------------|-----------------------|-----------------------|----------------------------|
| Age                                                 | <input type="radio"/> | <input type="radio"/> | <input type="radio"/>      | <input type="radio"/> | <input type="radio"/> | <input type="radio"/>      |
| American Society of Anaesthesiologists (ASA) status | <input type="radio"/> | <input type="radio"/> | <input type="radio"/>      | <input type="radio"/> | <input type="radio"/> | <input type="radio"/>      |
| Co-morbidities                                      | <input type="radio"/> | <input type="radio"/> | <input type="radio"/>      | <input type="radio"/> | <input type="radio"/> | <input type="radio"/>      |
| Ethnicity                                           | <input type="radio"/> | <input type="radio"/> | <input type="radio"/>      | <input type="radio"/> | <input type="radio"/> | <input type="radio"/>      |
| Frailty                                             | <input type="radio"/> | <input type="radio"/> | <input type="radio"/>      | <input type="radio"/> | <input type="radio"/> | <input type="radio"/>      |
| Hand dominance                                      | <input type="radio"/> | <input type="radio"/> | <input type="radio"/>      | <input type="radio"/> | <input type="radio"/> | <input type="radio"/>      |
| Indication for surgery                              | <input type="radio"/> | <input type="radio"/> | <input type="radio"/>      | <input type="radio"/> | <input type="radio"/> | <input type="radio"/>      |
| Occupation                                          | <input type="radio"/> | <input type="radio"/> | <input type="radio"/>      | <input type="radio"/> | <input type="radio"/> | <input type="radio"/>      |
| Sex/Gender                                          | <input type="radio"/> | <input type="radio"/> | <input type="radio"/>      | <input type="radio"/> | <input type="radio"/> | <input type="radio"/>      |
| Socioeconomic status                                | <input type="radio"/> | <input type="radio"/> | <input type="radio"/>      | <input type="radio"/> | <input type="radio"/> | <input type="radio"/>      |
| Weight or body mass index (BMI)                     | <input type="radio"/> | <input type="radio"/> | <input type="radio"/>      | <input type="radio"/> | <input type="radio"/> | <input type="radio"/>      |

Please list below any other patient factors you recommend investigating:

The association between this **implant factor** and failure of total elbow arthroplasty is important to be investigated?

|                                  | Strongly disagree     | Somewhat disagree     | Neither agree nor disagree | Somewhat agree        | Strongly agree        | I do not know what this is |
|----------------------------------|-----------------------|-----------------------|----------------------------|-----------------------|-----------------------|----------------------------|
| Fixation type                    | <input type="radio"/> | <input type="radio"/> | <input type="radio"/>      | <input type="radio"/> | <input type="radio"/> | <input type="radio"/>      |
| Implant design (linked/unlinked) | <input type="radio"/> | <input type="radio"/> | <input type="radio"/>      | <input type="radio"/> | <input type="radio"/> | <input type="radio"/>      |
| Implant model/generation         | <input type="radio"/> | <input type="radio"/> | <input type="radio"/>      | <input type="radio"/> | <input type="radio"/> | <input type="radio"/>      |
| Implant stem length              | <input type="radio"/> | <input type="radio"/> | <input type="radio"/>      | <input type="radio"/> | <input type="radio"/> | <input type="radio"/>      |

Please list below any other implant factors you recommend investigating:

The association between this **surgical factor** and failure of total elbow arthroplasty is important to be investigated?

|  | Strongly disagree | Somewhat disagree | Neither agree nor disagree | Somewhat agree | Strongly agree | I do not know what this is |
|--|-------------------|-------------------|----------------------------|----------------|----------------|----------------------------|
|--|-------------------|-------------------|----------------------------|----------------|----------------|----------------------------|

Please list below any other surgical factors you recommend investigating :

The association between this **surgeon/hospital factor** and failure of total elbow arthroplasty is important to be investigated?

[illegible]

Please list below any other surgeon/hospital factors you recommend investigating :

Have you had any of the joint replacement surgery below?

- ☐ Total elbow replacement
- ☐ Total shoulder replacement
- ☐ Other joint replacement
- ☐ None

Sex/Gender

- ☐ Female
- ☐ Male
- ☐ Other
- ☐ Would like not to say

What age group would you describe yourself?

- ☐ 18-40
- ☐ 41-50
- ☐ 51-60
- ☐ 61-70

- ☐ 71-80
- ☐ 81-90
- ☐ >90
